# Supplementary material for: Gi/o protein-coupled receptors in dopamine neurons inhibit the sodium leak channel NALCN
Source: eLife. 2018 Dec 17;7:e40984. doi: 10.7554/eLife.40984 (PMC6305199; doi:10.7554/eLife.40984)
Supplement: Figure 1—source data 1. [file elife-40984-fig1-data1.xlsx]

## Sheet: Sheet1
FIGURE 1
Figure 1C left				Figure 1C right
Time (min)	avg	sem			2 mM Ca	NMDG
-2	-57.7697	23.2757		c1	-39	-27.9
-1.5	-57.174	21.5142		c2	-25	-14.9
-1	-58.0251	19.6349		c3	-27.9	-5.8
-0.5	-54.9187	15.9219		c4	-36.8	-3.4
0	-54.8284	15.1581		c5	-104.8	-57.9
0.5	-27.6265	9.7179		c6	-51.3	-10.6
1	-23.1541	7.18582		c7	-33.2	2.9
1.5	-21.6913	7.15221		c8	-7.6	7.6
2	-22.7339	7.27607
2.5	-25.105	12.6556
Figure 1E left				Figure 1E Right
Time (min)	avg	sem		Time (min)	avg	sem
-2	-43.1967	5.42061		-2	-169.55	20.2445
-1.5	-48.3495	5.5579		-1.5	-179.317	20.4715
-1	-48.7758	5.74478		-1	-184.075	19.7708
-0.5	-51.1148	5.50003		-0.5	-193.414	21.3202
0	-52.4777	5.50314		0	-199.352	21.4059
0.5	-61.3063	6.04228		0.5	-126.015	15.0192
1	-73.716	7.19807		1	-108.4	15.2748
1.5	-84.3244	8.66849		1.5	-101.134	14.3687
2	-96.1609	10.0878		2	-100.235	13.9473
2.5	-106.613	10.9752		2.5	-99.7826	14.9326
3	-112.635	11.9341
3.5	-122.115	13.0018
4	-129.643	13.573
4.5	-138.09	14.2326
5	-146.517	15.775
5.5	-160.634	17.4681
6	-170.969	19.0595
6.5	-177.745	20.7313
7	-182.831	22.0489
7.5	-192.525	23.2513
8	-205.673	27.9977
8.5	-213.201	34.2602
9	-202.889	34.2581
9.5	-207.131	37.8774
10	-194.693	47.3251
Figure 1F
	2 mM Ca	0.1 mM Ca	NMDG
c1	-11.09	-86.01	-11.83
c2	-58.86	-248.8	-92.34
c3	-20.71	-137.22	-44.84
c4	-67.71	-126.56	-71.15
c5	-46.28	-212.18	-47.87
c6	-61.586	-186.861	-47.569
c7	-51.46	-194.66	-68.46
c8	-57.1	-269.4	-77
c9	-23.2	-187.6	-39.1
c10	-58.46	-281.5	-75
c11	-56	-247.7	-52.6
c12	-68.7	-243.1	-64.6
c13	-47.2	-409.8	-3.51
c14	-107.2	-372.7	-108.9
c15	-35.59	-102.56	-32.29
c16	-20.67	-192.41	-210.16
c17	-62.56	-91.55	-59.94
c18	-25.63	-70.53	-28.75
c19	-78.0518	-168.617	-88.5121
c20	-21.461	-61.6545	-31.4152
c21	-97.8629	-244.604	-78.3069
c22	-37.8573	-87.3596	-85.5298
Figure 1H left				Figure 1H Right
Time (min)	avg	sem		Time (min)	avg	sem
-2	-28.0769	10.4884		-2	-36.972	7.25593
-1.5	-30.0868	9.79319		-1.5	-38.1288	5.80058
-1	-23.4318	9.2923		-1	-38.7482	4.00073
-0.5	-26.0167	10.4212		-0.5	-36.3753	5.93836
0	-27.7556	11.1838		0	-35.9897	5.30033
0.5	-25.2956	11.2511		0.5	-30.8607	4.38353
1	-26.7199	11.5078		1	-31.9337	6.21493
1.5	-27.3305	11.0491		1.5	-32.087	8.00352
2	-20.7989	8.9893		2	-26.7091	6.42919
2.5	-21.5639	8.25521		2.5	-31.7997	10.1948
3	-21.5377	8.10732
3.5	-22.0487	7.59371
4	-21.6821	7.11921
4.5	-26.1324	7.38201
5	-23.3947	7.66968
5.5	-22.0978	5.7331
6	-24.2598	5.69332
6.5	-24.7798	6.87854
7	-28.129	7.3767
7.5	-28.2748	7.90702
8	-29.8088	9.9082
8.5	-40.6838	10.6177
9	-37.6014	9.24082
9.5	-37.1836	6.24505
10	-44.115	8.75575
Figure 1I
	2 mM Ca	0.1 mM Ca	NMDG
c1	-25.2	-37.69	-11.8
c2	-18.4	-35.3	-40.2
c3	-21.9216	-58.688	-52.5394
c4	-23.2119	-32.1857	-23.2119
c5	-31.5684	-35.9417	-30.5363
c6	-17.8923	-39.6915	-8.63428
c7	-19.9712	-21.0407	-16.7203
c8	-23.0795	-23.526	-19.28
c9	-6.25981	-28.7778	-18.3051
