# Supplementary material for: Gi/o protein-coupled receptors in dopamine neurons inhibit the sodium leak channel NALCN
Source: eLife. 2018 Dec 17;7:e40984. doi: 10.7554/eLife.40984 (PMC6305199; doi:10.7554/eLife.40984)
Supplement: Figure 2—source data 1. [file elife-40984-fig2-data1.xlsx]

## Sheet: Sheet1
FIGURE 2
Figure 2A
	2 mM Ca	0.1 mM Ca	dopamine	NMDG
c1	-61.7339	-159.931	-134.351	-120.871
c2	-39.6802	-95.6665	-74.9748	-75.4343
c3	-103.438	-216.068	-132.912	-116.504
c4	-56.0778	-192.863	-125.019	-72.0105
c5	-77.5383	-222.967	-108.482	-85.7148
c6	-39.0264	-147.189	-83.6268	-90.0764
c7	-64.6776	-224.893	-172.608	-183.472
c8	-46.936	-175.863	-127.496	-109.965
c9	-122.145	-360.955	-218.133	-234.337
c10	-42.163	-237.849	-180.607	-167.988
c11	-105.941	-293.524	-231.797	-83.9072
c12	-32.4642	-136.659	-103.561	-86.2096
c13	-31.0844	-115.249	-29.6975	-59.1437
c14	-91.5253	-236.139	-151.255	-140.84
Figure 2B
	2 mM Ca	0.1 mM Ca	dopamine	NMDG
c1	-26.1083	-48.1889	-69.7294	-74.2906
c2	-42.2749	-115.471	-113.697	-97.081
c3	-18.7033	-32.7702	-30.457	-28.8512
c4	-13.2203	-23.045	-29.1031	-26.5686
c5	-58.8705	-69.315	-75.4437	-85.861
c6	-29.3947	-70.2709	-80.3027	-86.8873
c7	-26.3616	-46.5196	-58.4592	-54.1422
Figure 2C
DA 300µM	DA 10µM	DA 1µM	DA 0,1µM
-16.1159	7.6851	40.0461	75.9885
11.9293	34.8128	41.1794	79.416
-0.349414	21.3456	49.0364	78.5656
2.16206			68.8393
			78.7484
Figure 2D
	2 mM Ca	0.1 mM Ca	dopamine	NMDG
c1	-30.4062	-116.668	-83.2097	-71.169
c2	-73.4227	-225.605	-166.825	-133.319
c3	-71.2093	-180.169	-146.128	-97.187
c4	-73.2457	-174.041	-110.224	-96.3934
c5	-83.1711	-235.586	-131.313	-84.2319
c6	-49.8155	-144.006	-97.22	-54.8365
Figure 2E								Figure 2F
	2 mM Ca	2 mM Ca 15 min	dopamine	NMDG					2 mM Ca	0.1 mM Ca	dopamine	NMDG
c1	-115.253	-182.597	-181.532	-84.892				c1	-54.9851	-222.341	-245.651	-175.669
c2	-57.2005	-81.3445	-92.6682	-56.2535				c2	-46.5734	-171.143	-176.283	-76.2416
c3	-55.4017	-106.982	-115.999	-78.5112				c3	-45.1848	-158.819	-169.743	-108.352
c4	-27.6146	-50.2147	-53.1251	-27.7156				c4	-49.4218	-212.614	-211.06	-129.745
c5	-118.492	-229.925	-233.207	-109.755				c5	-73.5263	-217.117	-172.212	-97.164
c6	-92.0458	-152.368	-145.149	-90.8733
c7	-36.8811	-94.8982	-95.972	-14.1008
c8	-38.6235	-108.999	-131.729	-48.4186
Figure 2H
	WT	NALCN KO	B-arr2 KO	GDP-BS internal
c1	25.58	-21.5405	33.4583	-23.31
c2	20.6917	1.774	58.78	-5.14
c3	83.156	2.3132	34.041	-10.924
c4	67.844	-6.0581	63.817	1.554
c5	114.485	-6.1287	104.273	44.905
c6	63.5622	-10.0318	46.786
c7	52.285	-11.9396
c8	48.367
c9	142.822
c10	57.242
c11	84.884
c12	61.727
c13	33.098
c14	85.5515
