# Supplementary material for: Gi/o protein-coupled receptors in dopamine neurons inhibit the sodium leak channel NALCN
Source: eLife. 2018 Dec 17;7:e40984. doi: 10.7554/eLife.40984 (PMC6305199; doi:10.7554/eLife.40984)
Supplement: Figure 3—figure supplement 1—source data 1. [file elife-40984-fig3-figsupp1-data1.xlsx]

## Sheet: correlation
frequency	effect
2.3716	33.9409
1.85252	100
2.08764	100
2.86179	61.1635
2.34831	82.5289
2.5152	44.1352
3.12224	33.465
3.38786	81.8489
3.79678	73.6816
4.69855	64.3647
4.88528	34.2075
3.30986	43.9856
5.02022	57.753
3.60493	22.3927
2.38723	61.1954
3.075	100
2.66449	31.4743
