# Supplementary material for: Gi/o protein-coupled receptors in dopamine neurons inhibit the sodium leak channel NALCN
Source: eLife. 2018 Dec 17;7:e40984. doi: 10.7554/eLife.40984 (PMC6305199; doi:10.7554/eLife.40984)
Supplement: Figure 3—figure supplement 2—source data 1. [file elife-40984-fig3-figsupp2-data1.xlsx]

## Sheet: Feuil5
Ba 500	Ba 500 + DA	Ba and terQ	Ba and terQ + DA	terQ	terQ + DA
3.0504	0	2.3716	1.56666	2.35967	0
2.70734	1.59579	1.85252	0	2.30916	0.789797
1.29417	0.359628	2.08764	0	2.58763	0
1.59059	0.12762	2.86179	1.11142	2.90968	0
2.84381	1.02992	2.34831	0.410277	3.51861	1.81612
		2.5152	1.40511
		3.12224	2.07738
		3.38786	0.614935
