# Supplementary material for: Gi/o protein-coupled receptors in dopamine neurons inhibit the sodium leak channel NALCN
Source: eLife. 2018 Dec 17;7:e40984. doi: 10.7554/eLife.40984 (PMC6305199; doi:10.7554/eLife.40984)
Supplement: Figure 3—source data 1. [file elife-40984-fig3-data1.xlsx]

## Sheet: Sheet1
FIGURE 3
Figure 3A						Figure 3C
	WT	NALCNKO				WT									KO
c1	-61.7339	-26.1083					0	0.1-0.99	1-1.99	2-2.99	3-3.99	4+				0	0.1-0.99	1-1.99	2-2.99	3-3.99	4+
c2	-39.6802	-42.2749				number of cells	13	26	64	41	2	0			number of cells	42	10	7	1	0	0
c3	-103.438	-18.7033				%	8.78	17.56	43.24	27.7	1.35	0			%	70	16.66	11.66	1.66	0	0
c4	-56.0778	-13.2203
c5	-77.5383	-58.8705
c6	-39.0264	-29.3947
c7	-64.6776	-26.3616
c8	-46.936	-0.653753
c9	-122.145	0
c10	-42.163	-27.2008
c11	-105.941	-2.68834
c12	-32.4642	-25.2
c13	-31.0844	18.4
c14	-78.4176	-21.9216
c15	-80.1192	-23.2119
c16	-35.828	-31.5684
c17	-41.2524	-17.8923
c18	-35.59	-19.9712
c19	-20.67	-23.0795
c20	-62.56	-3.78748
c21	-25.63
c22	-78.0518
c23	-21.461
c24	-97.8629
c25	-37.8573
c26	-11.09
c27	-58.86
c28	-20.71
c29	-67.71
c30	-46.28
c31	-61.586
c32	-51.46
c33	-57.1
c34	-23.2
c35	-58.46
c36	-56
c37	-68.7
c38	-47.2
c39	-107.2
Figure 3E left	CONTROL CONDITIONS			Barium/TerQ					Figure 3E Right							Figure 3G left	CONTROL CONDITIONS			Barium/TerQ				Figure 3G Right						Figure 3I left	CONTROL CONDITIONS			Barium/TerQ				Figure 3I Right
	avg	sem			avg	sem				cont	Dapuff	ba/terq	Dapuff				avg	sem			avg	sem			cont	Dapuff	ba/terq	Dapuff			avg	sem			avg	sem			cont	Dapuff	ba/terq	Dapuff
1	1.14091	0.0700044		1	1.0467	0.0761061			c1	2.04983	0	2.3716	1.56666			1	0.984535	0.0114732		1	0.994593	0.0133137		c1	2.21907	0	3.79678	0.999251		1	1.03119	0.117762		1	1.02216	0.0380387		c1	0.592832	0	2.89228	2.75719
2	1.08125	0.0359106		2	0.994059	0.0448616			c2	1.02495	0	1.85252	0			2	1.01362	0.031577		2	1.00945	0.0245501		c2	2.32323	0	4.69855	1.67434		2	1.16572	0.118346		2	0.980337	0.0133591		c2	1.0345	0	3.61931	3.75411
3	1.04575	0.0232143		3	0.947987	0.0383809			c3	0.462838	0	2.08764	0			3	1.00364	0.0176787		3	0.996343	0.0260549		c3	2.99366	0	4.88528	3.21414		3	0.952861	0.0977685		3	1.03463	0.0147763		c3	1.09091	0	1.88225	1.99663
4	0.961643	0.0729336		4	1.03432	0.058613			c4	1.4816	0	2.86179	1.11142			4	1.0068	0.0161711		4	1.01127	0.0168284		c4	1.96244	0	3.30986	1.854		4	0.900904	0.0995508		4	1.0115	0.0214485		c4	1.43349	0	3.54306	3.43569
5	1.06911	0.0457489		5	1.04701	0.0255828			c5	0.819686	0	2.34831	0.410277			5	1.01537	0.0161463		5	0.995745	0.0161162		c5	1.67968	0	5.02022	2.12089		5	1.02584	0.0881369		5	1.02174	0.0140879		c5	0.576712	0	2.49672	3.13234
6	0.913457	0.0870394		6	1.06431	0.102808			c6	1.68384	0	2.5152	1.40511			6	0.993555	0.0118424		6	0.99355	0.0200148		c6	2.54281	0	3.60493	2.79769		6	0.954186	0.0900685		6	1.00112	0.0239011		c6	1.15811	0	2.69316	3.26597
7	1.01037	0.0193116		7	0.961954	0.0530198			c7	2.41905	0	3.12224	2.07738			7	0.988681	0.0159293		7	0.991563	0.0187222		c7	1.09915	0	2.38723	0.926355		7	1.04924	0.0439173		7	0.994642	0.0210492		c7	1.17692	0	3.74024	4.22945
8	0.997003	0.0296506		8	0.936071	0.0563322			c8	1.75963	0	3.38786	0.614935			8	0.998078	0.0108855		8	0.967719	0.0134728		c8	2.03411	0	3.075	0		8	0.895785	0.0964893		8	1.00906	0.0210555		c8	1.2409	0	3.3275	3.93072
9	1.00344	0.0358409		9	0.983279	0.0446412										9	1.01188	0.0103159		9	1.01134	0.0118922		c9	1.40017	0	2.66449	1.82586		9	1.03078	0.0475083		9	0.96875	0.0209421
10	0.95955	0.0245988		10	0.984307	0.0570147										10	0.983838	0.0202044		10	1.02843	0.0185852								10	0.993497	0.123693		10	0.956066	0.0202978
11	0	0		11	0.507532	0.145785										11	0	0		11	0.869958	0.0279411								11	0	0		11	1.0339	0.023261
12	0	0		12	0.497008	0.11814										12	0	0		12	0.777696	0.0524763								12	0	0		12	1.03306	0.0176604
13	0	0		13	0.417609	0.114131										13	0	0		13	0.658442	0.0648571								13	0	0		13	1.07398	0.0223233
14	0	0		14	0.458644	0.100352										14	0	0		14	0.597548	0.0705686								14	0	0		14	1.07486	0.0374245
15	0	0		15	0.448579	0.0983849										15	0	0		15	0.513736	0.0858247								15	0	0		15	1.05468	0.0422758
16	0	0		16	0.501515	0.0890567										16	0	0		16	0.498103	0.082588								16	0.0402569	0.0402569		16	1.05701	0.04124
17	0	0		17	0.653164	0.11218										17	0	0		17	0.472971	0.0834113								17	0.0719576	0.0526044		17	1.10004	0.0396705
18	0	0		18	0.605539	0.0678915										18	0	0		18	0.492697	0.0760726								18	0.195563	0.129401		18	1.05502	0.0389915
19	0	0		19	0.607091	0.0380975										19	0	0		19	0.536704	0.065341								19	0.149808	0.112271		19	1.07338	0.0452324
20	0	0		20	0.492655	0.0600829										20	0	0		20	0.548795	0.0582554								20	0.188226	0.125961		20	1.1405	0.018147
21	0	0		21	0.611475	0.0660817										21	0	0		21	0.55514	0.064705								21	0.291434	0.200742		21	1.17085	0.0254233
22	0	0		22	0.719234	0.0852678										22	0	0		22	0.599183	0.0668235								22	0.234057	0.155421		22	1.16918	0.0369412
23	0	0		23	0.772262	0.104271										23	0.00301	0.00301		23	0.618821	0.0695978								23	0.239128	0.15707		23	1.13896	0.0341216
24	0	0		24	0.788938	0.112144										24	0.0424344	0.0424344		24	0.621135	0.0687273								24	0.241575	0.159236		24	1.11412	0.0382075
25	0	0		25	0.754389	0.128607										25	0.0472029	0.0472029		25	0.628483	0.0669819								25	0.242886	0.162945		25	1.10663	0.017805
26	0	0		26	0.735756	0.119001										26	0.0556546	0.0556546		26	0.617126	0.0664718								26	0.277378	0.176139		26	1.14509	0.0344793
27	0	0		27	0.658887	0.112007										27	0.0634334	0.0634334		27	0.614469	0.0741832								27	0.421023	0.201566		27	1.14321	0.0507282
28	0	0		28	0.755768	0.102798										28	0.068848	0.068848		28	0.633704	0.0722864								28	0.549875	0.219295		28	1.14617	0.0439156
29	0	0		29	0.636089	0.114024										29	0.0757387	0.0757387		29	0.624512	0.0710376								29	0.513365	0.200152		29	1.16099	0.0275246
30	0	0		30	0.616749	0.106655										30	0.0725333	0.0725333		30	0.643779	0.0760732								30	0.424407	0.16659		30	1.13892	0.040711
31	0	0		31	0.622918	0.105904										31	0.0836299	0.078115		31	0.643217	0.0700072								31	0.546111	0.203718		31	1.16542	0.038215
32	0	0		32	0.70283	0.0893527										32	0.091615	0.0784289		32	0.658472	0.062878								32	0.653739	0.199057		32	1.10832	0.0445195
33	0.0019365	0.0019365		33	0.744673	0.0932465										33	0.166139	0.109933		33	0.637078	0.0654623								33	0.55428	0.177675		33	1.11662	0.0489553
34	0.062493	0.062493		34	0.652651	0.0546245										34	0.161548	0.106854		34	0.655952	0.066284								34	0.651397	0.202733		34	1.1605	0.0361153
35	0.118686	0.118686		35	0.724053	0.0504136										35	0.164282	0.107143		35	0.647028	0.0698649								35	0.693537	0.204007		35	1.18909	0.0474184
36	0.116531	0.116531		36	0.654924	0.070378										36	0.20253	0.103708		36	0.633565	0.0794136								36	0.712765	0.233403		36	1.13975	0.0546498
37	0.116922	0.116922		37	0.657574	0.0485517										37	0.304	0.128748		37	0.657052	0.0789828								37	1.0094	0.235258		37	1.13228	0.0430567
38	0.118077	0.114982		38	0.699731	0.0436329										38	0.338557	0.136068		38	0.702602	0.0612184								38	0.790589	0.178218		38	1.15493	0.0239051
39	0.229177	0.150293		39	0.679104	0.0458519										39	0.359649	0.119024		39	0.694514	0.0642713								39	0.909121	0.190154		39	1.13178	0.0497693
40	0.242919	0.158967		40	0.731442	0.0505129										40	0.317501	0.121745		40	0.670003	0.0693299								40	0.925167	0.163962		40	1.08677	0.0570585
41	0.323763	0.163627		41	0.787739	0.0666233										41	0.303242	0.115589		41	0.658015	0.0683078								41	1.02693	0.178486		41	1.16625	0.0472009
42	0.345033	0.175215		42	0.714186	0.0449438										42	0.347832	0.116212		42	0.675428	0.0652486								42	1.06445	0.191065		42	1.13531	0.0347923
43	0.336081	0.171087		43	0.756038	0.0460669										43	0.355904	0.12718		43	0.709839	0.0637546								43	0.842344	0.135463		43	1.10852	0.0401904
44	0.333188	0.167345		44	0.726946	0.125059										44	0.395968	0.128457		44	0.727783	0.062872								44	1.04519	0.206607		44	1.1121	0.0692992
45	0.319671	0.158409		45	0.781054	0.0380684										45	0.374267	0.122074		45	0.710058	0.0568758								45	0.963879	0.151621		45	1.1507	0.0709442
46	0.317138	0.156893		46	0.967837	0.0789536										46	0.390901	0.126159		46	0.723465	0.0650197								46	1.06463	0.167986		46	1.16467	0.0854775
47	0.320347	0.157173		47	0.8075	0.149122										47	0.39359	0.116174		47	0.768246	0.0595463								47	0.866661	0.160939		47	1.16599	0.0675878
48	0.413748	0.159523		48	0.714429	0.113495										48	0.397983	0.114626		48	0.739761	0.0540596								48	0.921712	0.145097		48	1.16585	0.0683538
49	0.34961	0.156235		49	0.791761	0.0688665										49	0.384466	0.123608		49	0.721628	0.0567704								49	1.04205	0.172636		49	1.17219	0.0672338
50	0.354618	0.152586		50	0.757591	0.0650222										50	0.436585	0.12334		50	0.728218	0.0570134								50	0.952771	0.144512		50	1.13646	0.0555256
51	0.476237	0.186444		51	0.941082	0.071025										51	0.418779	0.115978		51	0.742027	0.0584905								51	0.996619	0.156774		51	1.15842	0.0623721
52	0.453688	0.176274		52	0.908702	0.0931832										52	0.386148	0.106764		52	0.753707	0.0552681								52	0.984916	0.152113		52	1.1708	0.0782401
53	0.426378	0.164775		53	0.806007	0.0724544										53	0.427272	0.115135		53	0.780324	0.0648113								53	0.856199	0.171783		53	1.12667	0.0530469
54	0.385438	0.155402		54	0.893093	0.151568										54	0.463258	0.10607		54	0.806894	0.0536942								54	1.03374	0.166668		54	1.15293	0.0597816
55	0.453461	0.171795		55	0.719902	0.0624632										55	0.449482	0.101229		55	0.777302	0.0533451								55	1.09865	0.184052		55	1.16914	0.0657538
56	0.43785	0.154499		56	0.722257	0.0503553										56	0.486023	0.0920119		56	0.802571	0.0507337								56	0.899748	0.154395		56	1.14795	0.0580995
57	0.657159	0.15885		57	0.763287	0.0952554										57	0.591124	0.062825		57	0.801709	0.055214								57	0.898963	0.138412		57	1.21855	0.0675916
58	0.649265	0.161508		58	0.767646	0.070838										58	0.55812	0.076419		58	0.783212	0.0424477								58	0.909566	0.134646		58	1.18726	0.0764587
59	0.523087	0.171713		59	0.734481	0.0452584										59	0.585718	0.0621462		59	0.799466	0.0472464								59	0.803574	0.145024		59	1.17267	0.0553393
60	0.699333	0.162325		60	0.797572	0.0343966										60	0.634707	0.0586714		60	0.773549	0.0459359								60	0.901082	0.144294		60	1.14651	0.0761061
61	0.560882	0.159128		61	0.796109	0.0449099										61	0.59534	0.0516281		61	0.794304	0.0478646								61	0.988993	0.14339		61	1.1812	0.0723302
62	0.65729	0.175969		62	0.79446	0.040277										62	0.608213	0.0666113		62	0.781467	0.0429125								62	1.08366	0.175362		62	1.22846	0.0685802
63	0.568002	0.174121		63	0.678583	0.102566										63	0.619548	0.0438245		63	0.785554	0.0489891								63	0.951749	0.145577		63	1.16703	0.0485411
64	0.537828	0.174994		64	0.76494	0.0579228										64	0.627074	0.048543		64	0.777626	0.0412514								64	1.13912	0.109779		64	1.18893	0.0517846
65	0.577304	0.173523		65	0.807031	0.0455443										65	0.685539	0.052133		65	0.78556	0.04349								65	1.08187	0.18941		65	1.21893	0.0736335
66	0.591713	0.179804		66	0.807762	0.0415383										66	0.653939	0.0469784		66	0.782687	0.0384894								66	1.12017	0.0580965		66	1.20618	0.0604333
67	0.580049	0.175485		67	0.772839	0.0476198										67	0.633892	0.0450905		67	0.808041	0.0471182								67	0.969605	0.0932537		67	1.18554	0.0608494
68	0.794865	0.202777		68	0.821432	0.0332232										68	0.644484	0.043125		68	0.848768	0.0432152								68	1.03967	0.103571		68	1.17125	0.0495666
69	0.485532	0.15302		69	0.861246	0.0592338										69	0.66782	0.03903		69	0.839606	0.037241								69	1.1213	0.150299		69	1.18013	0.0550805
70	0.740668	0.170483		70	0.863838	0.056444										70	0.701379	0.0372675		70	0.867318	0.0409202								70	0.989675	0.0832467		70	1.18473	0.0741049
71	0.606436	0.15788		71	0.912684	0.119093										71	0.675281	0.0389195		71	0.833516	0.0421112								71	1.01319	0.114263		71	1.15503	0.0615301
72	0.644605	0.162355		72	0.747469	0.0674075										72	0.666948	0.0368813		72	0.840035	0.0417445								72	1.12999	0.0701257		72	1.19718	0.0499411
73	0.629453	0.190483		73	0.835194	0.0615654										73	0.685396	0.0344371		73	0.840417	0.0381036								73	1.0826	0.124237		73	1.17444	0.0527409
74	0.759626	0.174365		74	0.824379	0.109453										74	0.71495	0.0326854		74	0.885284	0.0450033								74	1.25349	0.224172		74	1.17007	0.068361
75	0.633973	0.168655		75	0.859537	0.0856017										75	0.714595	0.038428		75	0.863505	0.0444556								75	1.07096	0.172325		75	1.24482	0.0680893
76	0.586647	0.164083		76	0.899797	0.0784861										76	0.716879	0.0405176		76	0.89089	0.0575839								76	1.10992	0.0719487		76	1.19482	0.0576272
77	0.755043	0.173659		77	0.912674	0.0893145										77	0.721386	0.0338907		77	0.83895	0.044839								77	1.17283	0.0828507		77	1.2186	0.0688764
78	0.745995	0.171307		78	0.855945	0.0664167										78	0.720971	0.0401333		78	0.851292	0.0415059								78	1.14242	0.137669		78	1.21369	0.0547124
79	0.714787	0.169154		79	0.808609	0.10521										79	0.743761	0.0409835		79	0.825259	0.0449021								79	1.12453	0.130227		79	1.20371	0.0702884
80	0.704665	0.171402		80	0.963412	0.129666										80	0.764131	0.0476513		80	0.834608	0.037097								80	1.1243	0.101212		80	1.20013	0.073282
81	0.632436	0.161806		81	0.84908	0.035758										81	0.685263	0.0471723		81	0.863541	0.0443825								81	0.988659	0.0769944		81	1.18571	0.0572913
82	0.755076	0.209582		82	0.860206	0.0415065										82	0.759334	0.0330871		82	0.861867	0.0414762								82	1.01227	0.081874		82	1.13654	0.0522194
83	0.722366	0.198137		83	0.850272	0.0432339										83	0.717639	0.0367972		83	0.854294	0.0434215								83	1.13674	0.154557		83	1.12846	0.0445136
84	0.735213	0.165251		84	0.948197	0.126203										84	0.744501	0.0359076		84	0.872311	0.0303091								84	1.19285	0.170295		84	1.17506	0.0528721
85	0.782834	0.183696		85	0.969354	0.15778										85	0.768607	0.0421833		85	0.866584	0.0391717								85	0.861188	0.148448		85	1.16594	0.0515787
86	0.783544	0.184391		86	0.982609	0.153813										86	0.762398	0.0353675		86	0.921763	0.0384418								86	1.21931	0.233789		86	1.21753	0.0712131
87	0.768709	0.179266		87	0.971804	0.148475										87	0.785594	0.0417187		87	0.908836	0.0422593								87	1.19124	0.154696		87	1.20504	0.0436317
88	0.759031	0.178826		88	1.04821	0.173096										88	0.808853	0.0245802		88	0.898036	0.04543								88	1.31009	0.306996		88	1.16186	0.0677688
89	0.759135	0.18018		89	1.1139	0.243001										89	0.793631	0.0412916		89	0.893021	0.0433362								89	0.790761	0.192955		89	1.12673	0.0481781
90	0.735518	0.170999		90	1.0679	0.157512										90	0.792364	0.0433501		90	0.883676	0.0323881								90	0.813656	0.247647		90	1.15988	0.0527656
91	0.755675	0.173905		91	1.12295	0.2519										91	0.770046	0.0402032		91	0.858756	0.0461046								91	1.0191	0.0275943		91	1.13957	0.0305184
92	0.826342	0.153455		92	1.05485	0.179794										92	0.78491	0.0319123		92	0.882705	0.0529875								92	1.10443	0.323063		92	1.17941	0.0393366
93	0.773848	0.175806		93	1.04177	0.17054										93	0.801492	0.0326733		93	0.887488	0.0436846								93	1.29065	0.419297		93	1.19071	0.0466114
94	0.698485	0.173567		94	0.99594	0.145887										94	0.772518	0.0317127		94	0.905643	0.0447845								94	0.985284	0.296465		94	1.21082	0.0455734
95	0.774659	0.175286		95	1.07193	0.197512										95	0.782093	0.0388524		95	0.90189	0.0404137								95	0.929223	0.23458		95	1.18556	0.0390552
96	0.828674	0.158183		96	1.05959	0.184018										96	0.783227	0.0323535		96	0.918998	0.0294016								96	1.00311	0.0268673		96	1.19902	0.0543538
97	0.835686	0.15395		97	1.04448	0.134609										97	0.780501	0.0337064		97	0.874304	0.0348949								97	1.18663	0.118048		97	1.17589	0.0689429
98	0.82856	0.152812		98	1.12084	0.185755										98	0.782983	0.0387128		98	0.893822	0.0375817								98	1.09854	0.0470655		98	1.18434	0.0528779
99	0.856804	0.164089		99	1.15317	0.255959										99	0.829743	0.0494261		99	0.901821	0.0439638												99	1.13044	0.0312135
100	0.765078	0.154038		100	1.08677	0.179139										100	0.787979	0.0308099		100	0.917707	0.039677												100	1.22994	0.0301909
101	0.710833	0.186582		101	0.963766	0.0848678										101	0.815398	0.0341223		101	0.909581	0.0370703												101	1.17779	0.0585818
102	0.850521	0.190554		102	0.964156	0.0837503										102	0.797728	0.0281456		102	0.902341	0.0466531												102	1.19207	0.0585354
103	0.689806	0.187175		103	1.00872	0.162526										103	0.784907	0.0409552		103	0.894285	0.0381364												103	1.17093	0.0611335
104	0.847238	0.191017		104	0.935606	0.069792										104	0.795707	0.0332121		104	0.921857	0.0368653												104	1.22717	0.0729275
105	0.81226	0.184384		105	0.875188	0.0594777										105	0.784931	0.0365677		105	0.940255	0.0510673												105	1.16941	0.0604789
106	0.83553	0.189349		106	0.891341	0.0524372										106	0.800276	0.0375851		106	0.905899	0.051128												106	1.17576	0.0413017
107	0.841991	0.19694		107	0.900602	0.0220676										107	0.808897	0.032343		107	0.910321	0.047024												107	1.15684	0.0318505
108	0.89056	0.215498		108	0.96421	0.0456065										108	0.85373	0.0391946		108	0.866702	0.0409425												108	1.15471	0.0461238
109	0.835538	0.189072		109	0.953921	0.0519369										109	0.846312	0.0425121		109	0.913514	0.0350939												109	1.16652	0.0607186
110	0.807703	0.177743		110	0.94857	0.0456733										110	0.814992	0.0411277		110	0.903617	0.0340625												110	1.1655	0.0527384
111	0.833704	0.188951		111	0.962448	0.0256303										111	0.796555	0.0408617		111	0.912734	0.0425338												111	1.18496	0.0465594
112	0.830053	0.18659		112	0.918149	0.0389123										112	0.810778	0.0353692		112	0.902362	0.0410935												112	1.16597	0.0430045
113	0.831765	0.186464		113	0.945363	0.0567134										113	0.813657	0.033748		113	0.92099	0.0362407												113	1.15696	0.0636315
114	0.804695	0.177229		114	0.938233	0.0327201										114	0.847255	0.0360484		114	0.965814	0.0507077												114	1.15564	0.0527218
115	0.668796	0.180775		115	0.941203	0.0481095										115	0.837962	0.0361792		115	0.91827	0.0334759												115	1.13308	0.0453005
116	0.794441	0.173225		116	0.957954	0.0334896										116	0.829804	0.0369142		116	0.913183	0.0404293												116	1.14591	0.0494693
117	0.782264	0.171592		117	0.981047	0.0445872										117	0.834783	0.0335157		117	0.915755	0.0322367												117	1.15452	0.057724
118	0.82873	0.188421		118	0.992865	0.065486										118	0.816554	0.037615		118	0.929444	0.0287708												118	1.18204	0.0623664
119	0.79636	0.176094		119	0.92266	0.0490992										119	0.908078	0.0834899		119	0.920583	0.0258705												119	1.17029	0.0449083
120	0.797672	0.170606		120	0.963672	0.0313088										120	0.869083	0.0525278		120	0.948691	0.0284341												120	1.11388	0.06624
121	1.08063	0.099973		121	0.929117	0.0407143										121	0.798961	0.0454016		121	0.931679	0.0394047												121	1.15039	0.0548033
122	1.13324	0.166725		122	1.0178	0.0911012										122	0.802288	0.0556717		122	0.920671	0.0361264												122	1.16685	0.0722718
123	0.997673	0.217791		123	0.924351	0.067046										123	0.8199	0.0604055		123	0.951526	0.0335804												123	1.11546	0.0501427
124	0.985503	0.0872966		124	0.930862	0.0688995										124	0.802124	0.0614082		124	0.959431	0.0278362												124	1.11441	0.0736714
125	0.883328	0.119375		125	0.908925	0.055052										125	0.785531	0.079643		125	0.95168	0.0179558												125	1.1379	0.0632508
126	0.761898	0.14575		126	0.919221	0.0410983										126	0.813714	0.0655284		126	0.9111	0.0358441												126	1.15832	0.0714618
127	0.965718	0.0673867		127	1.00175	0.0630552														127	0.934152	0.028274												127	1.1848	0.0780335
128	1.08278	0.112016		128	0.962256	0.0452399														128	0.921773	0.0428437												128	1.1323	0.0474623
129	0.969609	0.0788637		129	1.02076	0.0411405														129	0.899984	0.0398239												129	1.17103	0.0902376
130	0.872275	0.155044		130	0.992319	0.0325153														130	0.889611	0.0274211												130	1.15927	0.0768264
131	0.912378	0.0833184		131	1.02796	0.0424631														131	0.909275	0.0364991												131	1.10096	0.0840261
132	1.13416	0.153693		132	0.970162	0.0593926														132	0.943854	0.0423513												132	1.15814	0.0771515
133	1.00164	0.0832034		133	0.943084	0.0466453														133	0.974603	0.0298686												133	1.12218	0.0455561
134	1.1357	0.141448		134	0.919011	0.0513166														134	0.932205	0.0290077												134	1.15155	0.0855214
135	1.03623	0.0959176		135	0.928996	0.0495464														135	0.931882	0.0378131												135	1.1694	0.0426086
136	0.922039	0.134496		136	0.94523	0.0821588														136	0.934195	0.0356782												136	1.16448	0.0559884
137	1.11405	0.12332		137	0.900815	0.0282722														137	0.935079	0.038335												137	1.15471	0.0881441
138	1.11619	0.123934		138	0.97597	0.0518034														138	0.947522	0.029142												138	1.09487	0.0520543
139	1.13321	0.153736		139	0.96408	0.0257164														139	0.945309	0.0229006												139	1.16712	0.0374514
