# Supplementary material for: Gi/o protein-coupled receptors in dopamine neurons inhibit the sodium leak channel NALCN
Source: eLife. 2018 Dec 17;7:e40984. doi: 10.7554/eLife.40984 (PMC6305199; doi:10.7554/eLife.40984)
Supplement: Figure 4—source data 1. [file elife-40984-fig4-data1.xlsx]

## Sheet: Sheet1
FIGURE 4
Figure 4A
	2 mM Ca	0.1 mM Ca	baclofen	NMDG
c1	-52.7164	-193.298	-139.823	-121.46
c2	-52.2172	-186.663	-143.581	-145.928
c3	-41.3036	-145.792	-70.306	-124.176
c4	-61.0975	-216.781	-65.0239	-62.9304
c5	-17.4968	-92.9287	-51.0188	-55.2021
c6	-86.625	-193.504	-135.872	-150.851
c7	-97.7949	-226.753	-142.576	-157.503
c8	-74.6403	-224.033	-99.5731	-110.731
Figure 4B
	2 mM Ca	0.1 mM Ca	baclofen	NMDG
c1	-74.1437	-105.624	-103.533	-88.8037
c2	-14.0569	-38.9193	-42.6983	-51.85
c3	-76.4871	-101.383	-111.065	-113.797
c4	-33.9728	-60.7114	-68.0809	-63.4363
c5	-0.624056	-23.02	-37.3803	-36.5061
c6	-8.60493	-24.3517	-36.5354	-38.1647
c7	-0.526009	-27.2858	-33.95	-38.8464
