# Supplementary material for: Gi/o protein-coupled receptors in dopamine neurons inhibit the sodium leak channel NALCN
Source: eLife. 2018 Dec 17;7:e40984. doi: 10.7554/eLife.40984 (PMC6305199; doi:10.7554/eLife.40984)
Supplement: Figure 5—source data 1. [file elife-40984-fig5-data1.xlsx]

## Sheet: Sheet1
FIGURE 4
Figure 4Bleft	CONTROL CONDITIONS				Barium/TerQ				Figure 4B Right						Figure 4D left	CONTROL CONDITIONS				Barium/TerQ			Figure 4DRight
	avg	sem			avg	sem				cont	bclfn puff	ba/terq	bclfn puff			avg	sem			avg	sem			cont	bclfn puff	ba/terq	bclfn puff
1	0.997158	0.0162602		1	1.03504	0.034957			c1	2.17266	0	3.71377	0		1	1.0276	0.0567464		1	0.960093	0.0189954		c1	1.2355	0	4.011	3.85078
2	0.995729	0.0109454		2	1.01498	0.0185517			c2	1.86858	0	4.9013	0		2	0.883756	0.0831874		2	0.955078	0.0283006		c2	0.799583	0	2.29752	2.42387
3	1.02501	0.0123645		3	1.03743	0.0251404			c3	1.89816	0	3.3943	1.81283		3	1.06037	0.106107		3	1.03692	0.0346623		c3	0.727916	0	1.71746	1.72712
4	1.05466	0.0129644		4	1.01039	0.0170369			c4	1.79163	0	3.42917	2.05023		4	1.0819	0.0840095		4	1.00343	0.0280438		c4	1.15372	0	2.02971	1.95815
5	1.04177	0.0280845		5	0.993677	0.016819			c5	2.79461	0	4.76009	2.24058		5	0.909738	0.0534345		5	0.998492	0.0176669		c5	1.17126	0	7.68365	7.3614
6	1.05361	0.0187622		6	1.03014	0.0261236			c6	2.6454	0	3.61452	0		6	0.922372	0.0531238		6	1.09634	0.0744418		c6	0.465679	0	1.47069	1.68955
7	0.962641	0.0323885		7	1.01903	0.0348916			c7	1.37939	0	3.21258	0		7	1.07414	0.0639142		7	0.984894	0.0426439		c7	1.1166	0	2.50687	2.42682
8	1.02064	0.0261919		8	0.968406	0.0231981			c8	0.834138	0	2.3467	0		8	0.989143	0.0743854		8	0.976888	0.0252786		c8	2.05878	0	2.51544	2.7972
9	0.965835	0.0265639		9	0.997955	0.0315078									9	1.05889	0.0394269		9	0.962773	0.0397667
10	0.882946	0.0467555		10	0.892954	0.0258819									10	0.990696	0.0504296		10	1.02509	0.0200392
11	0.0848671	0.0848671		11	0.680892	0.0993456									11	0.276362	0.13805		11	0.984085	0.0519173
12	0.0459724	0.0459724		12	0.594875	0.10151									12	0.101828	0.101828		12	1.02646	0.0394848
13	0	0		13	0.421636	0.129928									13	0	0		13	0.951059	0.0469261
14	0	0		14	0.293573	0.120045									14	0	0		14	1.02818	0.0411457
15	0	0		15	0.233777	0.11421									15	0	0		15	0.971498	0.0460206
16	0	0		16	0.214874	0.105511									16	0	0		16	0.973077	0.0326429
17	0	0		17	0.200332	0.0984881									17	0	0		17	1.02155	0.0266095
18	0	0		18	0.189054	0.0857311									18	0.0145441	0.0145441		18	1.09198	0.0497703
19	0	0		19	0.165472	0.0708703									19	0.119524	0.103017		19	0.977006	0.0452276
20	0	0		20	0.185038	0.059549									20	0.214549	0.140776		20	1.04539	0.018743
21	0	0		21	0.192374	0.0569451									21	0.226873	0.14008		21	0.979293	0.032606
22	0	0		22	0.209962	0.050948									22	0.253879	0.144036		22	1.04148	0.0535695
23	0	0		23	0.243896	0.0564119									23	0.249126	0.123707		23	0.982699	0.0348819
24	0.00673913	0.00673913		24	0.262331	0.0449471									24	0.407626	0.197952		24	1.08284	0.0476705
25	0.025414	0.0205418		25	0.312924	0.0288655									25	0.40327	0.162404		25	0.978205	0.0902966
26	0.0804035	0.0526693		26	0.345057	0.0269073									26	0.458744	0.217612		26	1.01318	0.051028
27	0.123099	0.0772964		27	0.36185	0.0444893									27	0.664307	0.278396		27	1.10022	0.0553797
28	0.213356	0.101742		28	0.386664	0.0381074									28	0.705407	0.250525		28	1.07357	0.0527119
29	0.280896	0.109717		29	0.405461	0.0507801									29	0.750915	0.215676		29	0.97489	0.0543094
30	0.330689	0.122731		30	0.458781	0.0335277									30	0.689465	0.172791		30	1.01069	0.0490214
31	0.498102	0.110262		31	0.472935	0.0351807									31	0.649389	0.185815		31	1.09338	0.0554536
32	0.560693	0.107521		32	0.458082	0.0279685									32	0.807089	0.187803		32	1.03008	0.0687541
33	0.567763	0.106031		33	0.48919	0.0300437									33	0.694712	0.1656		33	0.973842	0.0484758
34	0.597396	0.0965314		34	0.487668	0.0316806									34	0.762081	0.177137		34	0.970933	0.0353852
35	0.569145	0.0982834		35	0.547119	0.0368518									35	0.840453	0.163088		35	1.05968	0.0654069
36	0.57706	0.0978798		36	0.526545	0.0349366									36	0.954414	0.181007		36	1.03044	0.0785005
37	0.588609	0.0910018		37	0.50258	0.0300185									37	0.873885	0.12319		37	0.952667	0.0301909
38	0.607877	0.0931879		38	0.571983	0.0379831									38	1.10827	0.12838		38	0.961722	0.0249682
39	0.607352	0.0965264		39	0.584077	0.039035									39	0.944788	0.0986162		39	1.07572	0.0644462
40	0.644875	0.0789255		40	0.598047	0.0396284									40	1.11922	0.0771668		40	0.937365	0.073949
41	0.724753	0.0688681		41	0.626943	0.0381301									41	1.2575	0.104546		41	1.01161	0.0434152
42	0.72104	0.0457265		42	0.604466	0.0429003									42	1.09196	0.0813716		42	1.02476	0.0543964
43	0.697137	0.0681061		43	0.607273	0.0350952									43	0.946607	0.0440037		43	0.968835	0.0456431
44	0.694185	0.0524296		44	0.64382	0.0451886									44	1.04068	0.122186		44	0.908685	0.0591084
45	0.727173	0.0416762		45	0.615685	0.036609									45	0.98041	0.119048		45	0.98767	0.0334299
46	0.761167	0.042145		46	0.613092	0.0472897									46	0.945092	0.1124		46	0.903635	0.0533548
47	0.753963	0.0263837		47	0.655139	0.0345164									47	0.958334	0.0897793		47	1.05567	0.123928
48	0.735046	0.0484822		48	0.730375	0.0598858									48	1.13664	0.135858		48	1.0613	0.0849445
49	0.750991	0.0474227		49	0.730798	0.0918763									49	1.16039	0.133111		49	0.930137	0.0536686
50	0.742784	0.0396297		50	0.714121	0.0602334									50	1.07558	0.0961027		50	0.871663	0.0607986
51	0.778871	0.0330869		51	0.694072	0.0485549									51	1.21105	0.159186		51	0.938418	0.0571702
52	0.808347	0.0438203		52	0.63852	0.0336781									52	1.11055	0.155699		52	0.923263	0.0446945
53	0.806125	0.0334608		53	0.658202	0.0348249									53	1.09207	0.122055		53	0.968274	0.03595
54	0.82202	0.0263306		54	0.655299	0.0234137									54	1.11216	0.107493		54	0.962287	0.0493391
55	0.803506	0.026216		55	0.688714	0.0337232									55	1.11866	0.108484		55	0.978446	0.0420695
56	0.876094	0.033887		56	0.690748	0.0313271									56	1.09108	0.133034		56	0.903003	0.0230977
57	0.867526	0.0774385		57	0.683575	0.0295876									57	0.975188	0.100478		57	1.01068	0.0510293
58	0.848862	0.0313379		58	0.679192	0.0387444									58	1.16799	0.118417		58	1.07494	0.0966946
59	0.859878	0.0380436		59	0.705353	0.0261886									59	1.05559	0.10834		59	0.940689	0.0341452
60	0.826898	0.0308836		60	0.708346	0.0317103									60	1.13473	0.139253		60	0.922361	0.0520885
61	0.823745	0.0276109		61	0.711359	0.0378674									61	1.19281	0.10805		61	1.00304	0.0552465
62	0.824535	0.0210279		62	0.724955	0.0319898									62	1.0631	0.111745		62	0.933827	0.0221099
63	0.863731	0.0333893		63	0.71903	0.0333719									63	1.19531	0.136251		63	0.936703	0.0342059
64	0.843351	0.0261577		64	0.730275	0.031807									64	1.18946	0.102077		64	0.99564	0.0703113
65	0.878679	0.041605		65	0.729987	0.0305398									65	1.10865	0.124094		65	0.910021	0.0354236
66	0.836713	0.0223226		66	0.771329	0.0291549									66	0.967085	0.10162		66	0.934919	0.0287299
67	0.885101	0.0571129		67	0.763272	0.0283705									67	1.08867	0.0950656		67	0.933005	0.0277318
68	0.889884	0.0325694		68	0.765207	0.0400315									68	1.19493	0.184745		68	0.910307	0.0239998
69	0.890061	0.0451075		69	0.753327	0.0413577									69	1.14262	0.121387		69	0.986935	0.0540456
70	0.91562	0.0651688		70	0.780115	0.0401659									70	1.10872	0.0868608		70	0.943725	0.0406087
71	0.936433	0.069402		71	0.776342	0.0340132									71	1.15698	0.0937363		71	0.883242	0.0536494
72	0.919295	0.0600333		72	0.749609	0.0319089									72	1.14364	0.09269		72	1.02909	0.0469247
73	0.862001	0.0217697		73	0.773572	0.0329049									73	1.10338	0.0702422		73	0.978308	0.0429086
74	0.867821	0.0215953		74	0.785729	0.0293867									74	1.14178	0.143334		74	1.09432	0.0708103
75	0.878722	0.0163482		75	0.761223	0.0281117									75	1.11326	0.117185		75	0.950334	0.0465454
76	0.904863	0.0323618		76	0.789003	0.0362418									76	1.26884	0.107594		76	0.932473	0.0380273
77	0.919313	0.0344498		77	0.809726	0.033011									77	1.13749	0.0828925		77	1.04622	0.0588169
78	0.949527	0.0433477		78	0.829245	0.0408914									78	1.16994	0.0966059		78	0.972913	0.0215486
79	0.962666	0.0685113		79	0.855297	0.0379101									79	1.09943	0.108526		79	0.926879	0.0211556
80	0.94004	0.0485103		80	0.868115	0.0501333									80	1.0672	0.130218		80	1.04226	0.0720759
81	0.939097	0.067781		81	0.845469	0.0429717									81	1.04952	0.0936587		81	0.937825	0.0497128
82	0.947853	0.0412529		82	0.854363	0.0497993									82	1.25702	0.116386		82	1.02939	0.0355973
83	0.94868	0.042624		83	0.829153	0.0359522									83	1.29183	0.0971638		83	1.00242	0.0370351
84	0.937339	0.0310924		84	0.865593	0.0398314									84	1.19548	0.106789		84	1.04999	0.0719224
85	0.951915	0.0463799		85	0.844117	0.0383414									85	1.38634	0.161252		85	1.04098	0.0575175
86	0.950719	0.0599185		86	0.85697	0.0412534									86	1.24877	0.123595		86	0.938283	0.0314572
87	0.964775	0.048219		87	0.879496	0.047411									87	1.15662	0.147423		87	0.953472	0.0212807
88	0.972056	0.0484346		88	0.906358	0.0545938									88	1.18461	0.129462		88	1.02003	0.0793281
89	0.980863	0.0671007		89	0.890471	0.0536512									89	1.2558	0.184009		89	0.966328	0.0250438
90	0.99625	0.0857377		90	0.902047	0.0564213									90	1.40741	0.180428		90	1.09734	0.0979387
91	1.01115	0.0737848		91	0.898383	0.0499349									91	1.17321	0.143525		91	1.08179	0.0603796
92	0.948478	0.0337611		92	0.875206	0.02953									92	1.17293	0.123999		92	0.982683	0.0506313
93	0.961536	0.0327865		93	0.886341	0.0313679									93	1.11765	0.137697		93	1.11295	0.0943632
94	0.945567	0.0217359		94	0.88213	0.0404301									94	1.2672	0.125556		94	0.972284	0.0406901
95	0.978319	0.037927		95	0.878253	0.037919									95	1.27438	0.177375		95	1.06706	0.0626654
96	0.994758	0.0413428		96	0.909979	0.0577486									96	1.32053	0.140181		96	1.04017	0.0290381
97	0.960633	0.0429572		97	0.924445	0.0610515									97	1.18743	0.0928153		97	0.993574	0.0188586
98	0.960859	0.0345985		98	0.928449	0.05456									98	1.21909	0.114107		98	1.1094	0.0885153
99	0.987564	0.0561433		99	0.934065	0.0480656									99	1.32608	0.181292		99	0.94733	0.0554652
100	0.971375	0.0408182		100	0.912178	0.0456817									100	1.23864	0.171173		100	1.10427	0.122653
101	1.00582	0.0594577		101	0.90165	0.0238755									101	1.33289	0.184816		101	1.10271	0.0935245
102	1.00284	0.0423198		102	0.962276	0.0436808									102	1.19012	0.230601		102	0.975312	0.0332466
103	1.02839	0.0636971		103	0.933625	0.0335665									103	1.32392	0.215494		103	1.08982	0.0669832
104	0.967259	0.0315254		104	0.960928	0.0353386									104	1.1826	0.142182		104	0.959434	0.0532458
105	0.97594	0.039154		105	0.963777	0.0518977									105	1.37702	0.223359		105	1.00827	0.0680209
106	0.973041	0.036298		106	0.928982	0.0303972									106	1.41288	0.196731		106	0.971102	0.0617088
107	0.952721	0.0251174		107	0.928832	0.0289925									107	1.32113	0.309587		107	0.94851	0.0526107
108	0.96313	0.0308181		108	0.959174	0.024488									108				108	1.05547	0.0320014
109	0.965602	0.0247896		109	0.909999	0.032084									109				109	1.14765	0.0936703
110	0.955337	0.0189905		110	0.945463	0.0347575									110				110	1.04995	0.0467907
111	0.962144	0.0178023		111	0.962581	0.0278086									111				111	1.07505	0.048879
112	0.982998	0.016473		112	0.910631	0.0345482									112				112	0.962847	0.0655865
113	0.994123	0.0303912		113	0.97812	0.017787									113				113	1.00698	0.0363061
114	1.01822	0.0403415		114	0.983914	0.0186782									114				114	0.948581	0.0384641
115	0.969379	0.0246752		115	0.956272	0.0295215									115				115	1.05052	0.0545291
116	0.97062	0.0252705		116	0.971547	0.0300411									116				116	1.00219	0.0246094
117	0.978459	0.0116891		117	0.994495	0.033672									117				117	1.11451	0.114866
118	0.97002	0.00689376		118	1.00405	0.0642627									118				118	1.00499	0.0135755
119	0.969664	0.0296274		119	0.973808	0.0181917									119				119	1.01064	0.0223969
120	0.977507	0.0175538		120	0.959714	0.0337229									120				120
121	0.965272	0.0180699		121	0.975495	0.0289231									121				121
122	0.965816	0.0177212		122	0.96975	0.0212906									122				122
123	1.00987	0.0225947		123	0.983107	0.0313567									123				123
124	0.987572	0.0163696		124	1.04566	0.0691705									124				124
125	0.971296	0.0121053		125	1.02098	0.0446818									125				125
126	0.992007	0.015534		126	1.00756	0.0441833									126				126
127	0.987371	0.0133631		127	0.966015	0.0487254									127				127
128	0.988733	0.021422		128	0.974803	0.0303772									128				128
129	0.982334	0.0103117		129	0.969167	0.03424									129				129
130	0.976541	0.0171802		130	0.976268	0.0405026									130				130
131	1.01115	0.0344604		131	0.976989	0.0270505									131				131
132	1.06264	0.0705628		132	0.968771	0.0449586									132				132
133	1.03512	0.0409111		133	1.00841	0.0301625									133				133
134	1.05344	0.0616418		134	1.00058	0.0322184									134				134
135	1.06208	0.0673862		135	1.0592	0.0262824									135				135
136	0.988791	0.0617125		136	1.03156	0.0206855									136				136
137	0.98928	0.0538702		137	1.03428	0.0427872									137				137
138	0.975446	0.02885		138	1.06002	0.0207363									138				138
139	1.03112	0.056336		139	0.999131	0.0198858									139				139
