# Supplementary material for: Gi/o protein-coupled receptors in dopamine neurons inhibit the sodium leak channel NALCN
Source: eLife. 2018 Dec 17;7:e40984. doi: 10.7554/eLife.40984 (PMC6305199; doi:10.7554/eLife.40984)
Supplement: Figure 6—source data 1. [file elife-40984-fig6-data1.xlsx]

## Sheet: Fig6
Fig. 6 B					Fig. 6D				Fig. 6E
					time (ms)	Instant. Fr (Hz)			control	bclfn 300 nM	CGP 1µM
Bclfn 1µM	Bclfn 0.3 µM	Bclfn 0.1µM
					117199	0.723356			1.8697	1.02637	2.20033
25.5451	74.4549	25.5451			118612	0.707464			3.69882	1.49392	3.67623
15.7836	84.2164	15.7836			119758	0.87294			1.56475	0.706922	1.6587
18.7434	81.2566	18.7434			121152	0.717593			2.48156	1.74581	2.62068
24.5075	75.4925	24.5075			122416	0.791076			1.17273	0.440173	1.33962
21.1897	78.8103				123634	0.820581			1.92906	0	2.25403
					124736	0.907525			4.02103	2.08509	4.4173
					125884	0.87108
					127032	0.871537
					128211	0.847704
					128990	1.28493
					130327	0.747524
					131556	0.814198
					132856	0.768907
					134267	0.708945
					135510	0.804051
					136706	0.836262
					137821	0.8971
					139018	0.835073
					140156	0.879012
					141089	1.07152
					142128	0.962363
					143214	0.920771
					144559	0.743581
					145910	0.740055
					147323	0.707965
					148515	0.838849
					150033	0.65885
					151249	0.822506
					152423	0.851857
					153380	1.04423
					154225	1.1835
					155277	0.951022
					156468	0.839631
					157515	0.954839
					158726	0.826169
					160028	0.767515
					161148	0.893381
					162209	0.942424
					163323	0.897213
					164122	1.25156
					164962	1.19134
					165757	1.25668
					166546	1.2675
					167354	1.23832
					168294	1.06399
					169427	0.882612
					170618	0.839564
					171851	0.810968
					172882	0.969785
					173974	0.91583
					175132	0.863371
					176285	0.867679
					177072	1.2709
					177784	1.40468
					178371	1.70331
					179054	1.46359
					179856	1.24649
					180718	1.16043
					181594	1.14161
					182625	0.970079
					183525	1.11061
					184693	0.856382
					185703	0.989854
					186877	0.851755
					188070	0.838399
					189202	0.883587
					190182	1.01979
					191347	0.85822
					192105	1.31986
					192876	1.2961
					193504	1.59426
					194300	1.25581
					195308	0.991818
					196418	0.901548
					197221	1.24441
					197812	1.69263
					198554	1.34833
					199592	0.96284
					200599	0.992848
					201088	2.04604
					202146	0.944956
					203313	0.857116
					204549	0.808898
					205676	0.887151
					206805	0.886414
					207851	0.955467
					208953	0.90748
					209952	1.00081
					210844	1.12188
					211692	1.17911
					212809	0.895255
					213812	0.996761
					214707	1.11744
					215849	0.875501
					216937	0.919329
					218002	0.939243
					219086	0.921991
					220234	0.871198
					221294	0.943577
					222375	0.925069
					223370	1.00492
					224328	1.04428
					225203	1.14227
					226259	0.947054
					227235	1.02466
					228408	0.852515
					229525	0.894805
					230699	0.851834
					231784	0.921778
					232507	1.38408
					233596	0.917681
					234796	0.833963
					235727	1.07336
					236730	0.997319
					237599	1.15021
					238476	1.14064
					239338	1.15976
					240362	0.976518
					241391	0.97229
					242374	1.01724
					243713	0.746626
					244963	0.8002
					245883	1.08642
					246981	0.91124
					247990	0.990696
					248883	1.12031
					249849	1.03461
					250815	1.0352
					251960	0.873208
					253139	0.848356
					254128	1.01117
					254900	1.29586
					255546	1.5469
					256370	1.21329
					257341	1.03045
					258371	0.970874
					259705	0.749827
					260774	0.93518
					261760	1.01385
					262757	1.00307
					263636	1.13798
					264568	1.07307
					265610	0.959779
					266575	1.03567
					267558	1.01729
					268432	1.14412
					269276	1.18483
					270246	1.03139
					271075	1.20568
					272000	1.08145
					272788	1.26994
					273641	1.17113
					274615	1.02702
					275682	0.936905
					276645	1.03899
					277513	1.15162
					278181	1.49827
					279196	0.984918
					280183	1.01282
					281261	0.927509
					282199	1.06695
					283345	0.8726
					284332	1.01256
					285369	0.964873
					286342	1.02693
					287509	0.857082
					288333	1.21364
					289260	1.07904
					290093	1.20012
					291016	1.08408
					291847	1.20337
					292705	1.1655
					293287	1.71757
					294276	1.011
					295155	1.1377
					296029	1.14363
					296980	1.05225
					297866	1.12895
					298715	1.17729
					299576	1.16148
					300468	1.12076
					301575	0.903598
					302655	0.925337
					303546	1.12289
					304182	1.57148
					304991	1.23595
					305876	1.13074
					306802	1.08006
					307870	0.936001
					308846	1.02433
					309887	0.960528
					310812	1.08207
					311840	0.972172
					312654	1.22869
					313610	1.04647
					314630	0.980392
					315683	0.949048
					316617	1.07117
					317530	1.0948
					318363	1.20152
					319370	0.992156
					320448	0.927698
					321391	1.06143
					322461	0.934115
					323345	1.1311
					324261	1.0923
					325251	1.00978
					326221	1.03093
					327017	1.25559
					327964	1.05656
					328852	1.12664
					329751	1.11173
					330810	0.943786
					331768	1.04483
					332682	1.09349
					333708	0.975223
					334662	1.04719
					335479	1.22483
					336410	1.07451
					337347	1.06713
					338251	1.10543
					339258	0.993172
					340393	0.881276
					341368	1.02534
					342260	1.12108
					343176	1.09245
					344054	1.13859
					344857	1.24494
					345653	1.25604
					346263	1.63985
					347019	1.32357
					347914	1.11627
					348856	1.06196
					349882	0.974807
					350734	1.17375
					351426	1.44457
					352310	1.13118
					353180	1.14934
					353888	1.41312
					354693	1.24171
					355817	0.889531
					356736	1.08888
					357609	1.1447
					358269	1.5163
					359010	1.34947
					359843	1.19994
					360621	1.28576
					361278	1.52149
					362141	1.15896
					362974	1.20116
					363631	1.52041
					364144	1.95086
					364978	1.1994
					365957	1.02109
					366912	1.04757
					368064	0.868008
					368897	1.20021
					369698	1.24795
					370612	1.09469
					371274	1.50943
					372138	1.15749
					373029	1.12245
					373860	1.20314
					374825	1.03607
					375619	1.26024
					376569	1.05294
					376918	2.86097
					377348	2.32389
					378235	1.12752
					379219	1.0171
					380309	0.916958
					381396	0.920466
					382473	0.927913
					383545	0.932781
					384844	0.770064
					385850	0.993881
					386726	1.14188
					387598	1.14609
					388639	0.960701
					389581	1.06129
					390477	1.11693
					391371	1.11779
					392277	1.10436
					393277	1.00012
					394400	0.890645
					395395	1.00496
					396615	0.819378
					397480	1.15578
					398272	1.26263
					399099	1.2101
					400081	1.01784
					400975	1.11822
					401943	1.03373
					402983	0.961076
					403704	1.38744
					404557	1.1725
					405582	0.97555
					406646	0.939794
					407785	0.878325
					409041	0.795723
					410110	0.935235
					410996	1.1297
					412055	0.944231
					413338	0.779499
					414443	0.904798
					415402	1.04228
					416674	0.786125
					417769	0.913529
					418811	0.959808
					419707	1.1156
					420797	0.917958
					422022	0.816077
					423342	0.757468
					424976	0.611866
					426320	0.744273
					427497	0.849527
					428653	0.865473
					430200	0.646204
					431543	0.744515
					435327	0.264292
					437452	0.470706
					439515	0.484665
					441594	0.480834
					443940	0.42628
					446403	0.406009
					448362	0.510489
					454773	0.155988
					459904	0.1949
					463940	0.247787
					467922	0.251124
					470203	0.438374
					472897	0.371191
					476209	0.301918
					481498	0.18906
					484133	0.37952
					499540	0.0649073
					505391	0.170894
					508483	0.323425
					511161	0.373513
					524049	0.0775897
					527962	0.255567
					533758	0.172525
					543730	0.100286
					547123	0.294643
					549998	0.347879
					552862	0.349147
					556406	0.282202
					560388	0.251079
					562322	0.517197
					566894	0.218741
					567657	1.30997
					569412	0.569801
					572018	0.383776
					574725	0.369396
					576670	0.514073
					577335	1.50376
					578391	0.946802
					579909	0.658952
					580658	1.33467
					584084	0.29188
					596148	0.0828943
					599701	0.281408
					601701	0.500109
					604112	0.414733
					606385	0.439899
					612404	0.166154
					616714	0.231985
					621439	0.211668
					624168	0.366368
					627763	0.278217
					628992	0.813215
					629565	1.74482
					630569	0.996264
					631469	1.11157
					633300	0.546131
					637963	0.214448
					645013	0.141834
					655505	0.0953101
					657136	0.61345
					667335	0.0980476
					668307	1.02874
					669815	0.663157
					674513	0.212811
					678040	0.283547
					684877	0.146279
					690353	0.182584
					697969	0.131318
					699978	0.497528
					701501	0.65676
					704296	0.357742
					706593	0.43541
					708053	0.685049
					709465	0.70809
					713582	0.242881
					715645	0.484981
					718041	0.417188
					725475	0.134516
					727185	0.585009
					729442	0.443041
					732713	0.30567
					736956	0.235714
					739541	0.386857
					742056	0.397644
					743747	0.591038
					751156	0.134971
					753842	0.372335
					755950	0.474327
					757888	0.516196
					759514	0.614817
					760918	0.712251
					762233	0.760782
					763736	0.665253
					764979	0.804263
					766243	0.791257
					767328	0.921818
					768331	0.996574
					769735	0.712409
					771268	0.652316
					772425	0.864211
					773488	0.940513
					774422	1.07052
					775436	0.986741
					776360	1.08152
					777248	1.12597
					778305	0.946689
					779221	1.09126
					780390	0.855707
					781547	0.864351
					782492	1.05778
					783329	1.19546
					784232	1.10688
					785208	1.02452
					786110	1.10872
					787056	1.05687
					787914	1.16542
					788700	1.27277
					789619	1.08851
					790353	1.36263
					791068	1.39775
					791836	1.30208
					792606	1.29976
					793403	1.2548
					794110	1.4138
					794881	1.29702
					795691	1.23524
					796665	1.02689
					797681	0.984252
					798675	1.00591
					799416	1.34896
					800073	1.52352
					800657	1.71233
					801418	1.31384
					802229	1.23314
					802971	1.3476
					803709	1.3541
					804405	1.43717
					805353	1.05471
					806310	1.04548
					807141	1.20265
					808109	1.03292
					808986	1.1405
					809870	1.1321
					810829	1.04214
					811592	1.31137
					812625	0.967586
					813537	1.09687
					814329	1.26303
					815060	1.3667
					815936	1.14229
					816684	1.3369
					817534	1.17578
					818306	1.29649
					819150	1.18387
					819900	1.33433
					820665	1.30719
					821473	1.23686
					822352	1.13838
					823028	1.4782
					823722	1.44196
					824396	1.48313
					825013	1.62157
					825591	1.72954
					826385	1.25895
					826996	1.638
					827623	1.59426
					828365	1.34771
					829056	1.44731
					829729	1.48575
					830471	1.34805
					831403	1.07217
					832136	1.36565
					832877	1.34953
					833693	1.22436
					834518	1.21276
					835352	1.19841
					836177	1.21322
					837046	1.15075
					837967	1.08504
					838864	1.11553
					839681	1.22352
					840393	1.40351
					840966	1.74787
					841575	1.64086
					842165	1.6951
					842735	1.75458
					843249	1.94671
					843809	1.78353
					844532	1.38301
					845200	1.49799
					845740	1.85099
					846359	1.61535
					847023	1.50617
					847504	2.08035
					848137	1.58056
					848890	1.32802
					849760	1.14885
					850749	1.01093
					851756	0.99348
					852721	1.03634
					853304	1.71343
					854023	1.3907
					854792	1.30113
					855543	1.33167
					856225	1.46695
					857174	1.05298
					858088	1.09454
					859114	0.974778
					859936	1.2159
					860849	1.09597
					861625	1.28783
					862557	1.07368
					863628	0.933707
					864548	1.08592
					865470	1.08452
					866421	1.05173
					867341	1.08755
					868139	1.25274
					868904	1.30815
					869628	1.38086
					870459	1.2031
					871164	1.41731
					871978	1.23001
					872804	1.21029
					873436	1.58228
					874275	1.19216
					875158	1.13226
					876000	1.18756
					876812	1.23153
					877733	1.08556
					878576	1.18571
					879304	1.37445
					879997	1.44235
					880678	1.46843
					881357	1.47438
					881953	1.67645
					882629	1.47929
					883284	1.52672
					883869	1.7094
					884465	1.67891
					885074	1.6417
					885803	1.37174
					886506	1.42273
					887095	1.69599
					887706	1.63666
					888358	1.53418
					888966	1.64575
					889621	1.52555
					890246	1.60112
					890896	1.53891
					891501	1.65153
					892109	1.64491
					892712	1.65958
					893416	1.41894
					893919	1.99129
					894438	1.92493
					895004	1.76776
					895604	1.6658
					896298	1.44183
					897030	1.36519
					897626	1.67944
					898365	1.35272
					899071	1.41618
					899726	1.52599
					900271	1.83697
					900952	1.46749
					901648	1.43678
					902461	1.22935
					903104	1.55657
					903853	1.33511
					904896	0.958543
					905858	1.03923
					906688	1.20564
					907473	1.27368
					908175	1.42488
					908738	1.77581
					909245	1.9736
					909615	2.70042
					910226	1.63716
					910900	1.48395
					911599	1.43074
					912435	1.19599
					913208	1.29324
					914000	1.26243
					914784	1.27531
					915537	1.32802
					916305	1.30219
					917181	1.14196
					917892	1.40548
					918726	1.1994
					919577	1.17466
					920409	1.20219
					921431	0.978593
					922282	1.17457
					923118	1.19742
					923859	1.34816
					924722	1.15942
					925712	1.00978
					926403	1.44783
					927162	1.31752
					927900	1.35375
					928722	1.21793
					929359	1.56801
					929712	2.83487
					930341	1.58919
					931035	1.44144
					931713	1.47574
					932665	1.05056
					933546	1.13403
					934327	1.28174
					934990	1.50631
					935763	1.29471
					936436	1.48437
					937161	1.38062
					937884	1.38325
					938468	1.70995
					939066	1.67382
					939806	1.35169
					940711	1.10467
					941583	1.1472
					942356	1.29377
					943207	1.17397
					944079	1.14778
					944839	1.31503
					945415	1.73724
					946002	1.70195
					946531	1.89081
					947265	1.36217
					948048	1.27806
					948796	1.33679
					949628	1.20147
					950482	1.17096
					951352	1.14918
					952294	1.06242
					953169	1.14212
					953987	1.22334
					954712	1.37765
					955567	1.1707
					956372	1.24137
					956964	1.6899
					957541	1.73385
					958425	1.13122
					959320	1.11693
					960408	0.919223
					961242	1.19886
					962018	1.28949
					962542	1.90567
					963292	1.33411
					964114	1.21618
					964828	1.40093
					965625	1.2553
					966500	1.14253
					967430	1.07527
					968198	1.30187
					969178	1.02028
					970071	1.11951
					971029	1.04357
					971921	1.1217
					972852	1.07455
					973761	1.10019
					974628	1.15324
					975430	1.24562
