# Supplementary figures and images for: Gi/o protein-coupled receptors in dopamine neurons inhibit the sodium leak channel NALCN
Source: eLife journal article supplement (doi:10.7554/elife.40984), 2018-12-17

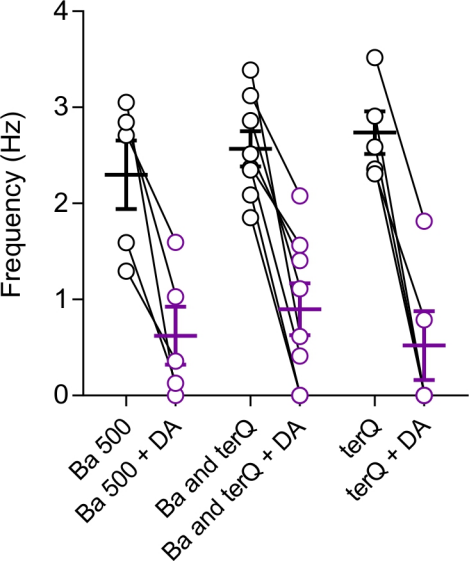

Supplement: supp [file elife-40984-supp-v1.zip]

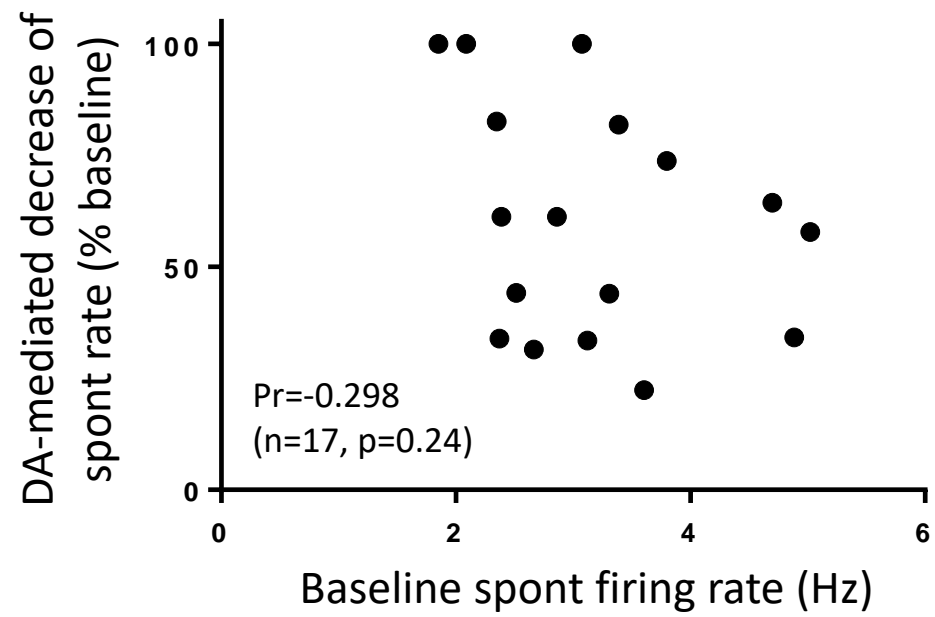

Supplement: supp [file elife-40984-supp-v1.zip]
